# Supplementary material for: A one-step synthesis of a free base secochlorin from a 2,3-dimethoxy porphyrin
Source: Royal Society of Chemistry journal article supplement (doi:10.1039/b102139g), 2001-01-01
Supplement: b102139g.doc [file b102139g.doc]

Supplementary material for ‘A one step synthesis of a free base secochlorin from a 2,3-dimethoxy porphyrin’

# Jonathan L. Sessler*, Sergiy V. Shevchuk, Wyeth Callaway, Vincent Lynch

## Department of Chemistry and Biochemistry, Institute for Cellular and Molecular Biology, The University of Texas at Austin, Austin, TX 78712-1167

Experimental.

All reagents (obtained from Aldrich Chemical Co.) and solvents (purchased from EM Science) were of reagent grade quality and used without further purification unless otherwise stated. Spectroscopic grade dichloromethane used for the UV-vis experiments was passed quickly through activated aluminum oxide prior sample preparations. All NMR solvents were purchased from Cambridge Isotope Laboratories, Inc. SAI silica gel 60 (230-400 mesh) and Aldrich aluminium oxide, activated, neutral, Brockmann I standard grade, 150 mesh, 58 Å were used for column chromatography. Thin layer chromatography was performed on silica gel 60 Å, 200 m plates purchased from Scientific Adsorbents, Inc. Electronic absorption spectra were recorded on a Beckman DU-7 spectrophotometer, using 1 cm quartz cells. Proton and 13C NMR spectra were obtained on either Varian UNITY+ 300 or Varian 500 MHz spectrometers. Mass spectra were measured with either a Finnigan-MAT 4023, Bell and Howell 21-491 or VG Analytical ZAB E/SE instrument. Elemental analyses were performed by Atlantic Microlab, Inc. A 250 W projection lamp was used as a light source for the photosensitized oxidative cleavage experiment.

## **2,3-Dimethoxy-6,18-methyl-7,19-(3-hydroxypropyl)-12,13-diethyl porphyrin (3).** To a 250 ml round bottom flask was added 2,5-bis[(3-(3-(hydroxypropyl)-5-formyl-4-methylpyrrol-2-yl)methyl]-3,4-diethylpyrrole (0.4800 g, 1 mmol) and freshly sublimed 2,3-dimethoxypyrrole (0.1270 g, 1 mmol), 200 ml of a solution of TFA (5% in dichloromethane) was added and the reaction was stirred for two hours. After this time, the disappearance of starting materials was confirmed via TLC analysis (dichloromethane : methanol / 96 : 4). The reaction was then neutralized with triethylamine, and DDQ (1.04 mmol) was added. After stirring for 1 hour, the reaction mixture was concentrated on a rotary evaporator. The resulting residue was dissolved in 500 ml dichloromethane and washed with aqueous NaHCO3 (2  250 ml) and H2O (2  250 ml). At this juncture, the organic layer was separated and dried over Na2SO4. Column chromatography over silica gel with dichloromethane/methanol (99.5 : 0.5) as the mobile phase served to remove acyclic components and provided a bright red solution that was concentrated to yield 0.3477 g of a mixture of **1** and **3**. CI MS (M+H): 571 (100 %), 603 (22 %).

##

## **2,3-Dimethoxy-6,18-methyl-7,19-(3-acetoxypropyl)-12,13-diethyl porphyrin (4).** To a solution of the mixture of **1** and **3** (0.030 g) in a 50 ml round bottom flask was added triethylamine (40 μl, 0.284 mmol) and dimethylaminopyridine (2 mg, 0.016mmol). Then, acetic anhydride (18 μl, 0.189 mmol) was added. The reaction was stirred 45 minutes and left standing overnight. The resulting red solution was quenched with 2 ml saturated aqueous NaHCO3 and stirred for 1 hour. The organic layer was separated and dried over Na2SO4 before being concentrated in vacuo. The concentrate was redissolved in 3:1 hexane/dichloromethane and solvent removed on a rotary evaporator until the product precipitated. Purification by column chromatography on silica gel using hexane : ethyl acetate (70 : 30) as the eluent gave 25 mg (0.38 mmol) of **4**.

## **2,3-Dicarboxylate-dimethylester-6,18-methyl-7,19-(3-acetoxypropyl)-12,13-diethyl secochlorin (2).** Secochlorin **2** (2 mg, 0.003 mmol) was isolated in low yield from a chromatographic purification process used to prepare of the bis-acetoxyporphyrin **4**.

It was also prepared as follows: To a solution of **4** (0.6545 g, 1 mmol) in 100 ml of O2-saturated methanol, Rose Bengal (0.015 g) was added. The mixture was stirred for 10 h under a 250 W light source. At this time, the mixture was filtrated through celite and the solvent was removed under reduced pressure. Column chromatography over silica gel (hexanes : ethyl acetate / 75 : 25, eluent) provided the secochlorin **2** in 68 % yield (0.4671 g).

**X-ray Experimental.**

Crystals grew as thin, dark plates and prisms by slow diffusion of pentane into dichloromethane solution of **2**. The data crystal was a plate that had approximate dimensions: 0.35 x 0.30 x 0.10 mm. The data were collected on a Nonius Kappa CCD diffractometer using a graphite monochromator with MoK radiation ( = 0.71073Å). A total of 239 frames of data were collected using -scans with a scan range of 2 and a counting time of 90 seconds per frame. The data were collected at –150 C using a Oxford Cryostream low temperature device. Details of crystal data, data collection and structure refinement are listed in Table 1. Data reduction were performed using DENZO-SMN.1 The structure was solved by direct methods using SIR922 and refined by full-matrix least-squares on F2 with anisotropic displacement parameters for the non-H atoms using SHELXL-97.3 The hydrogen atoms positions were obtained from a F map and refined with isotropic displacement parameters. The function, w(|Fo|2 - |Fc|2)2, was minimized, where w = 1/[((Fo))2 + (0.0340*P)2 + (0.5636*P)] and P = (|Fo|2 + 2|Fc|2)/3. Rw(F2) refined to 0**.**1136, with R(F) equal to 0.0498 and a goodness of fit, S, = 1.048. Definitions used for calculating R(F),Rw(F2) and the goodness of fit, S, are given below.2 Neutral atom scattering factors and values used to calculate the linear absorption coefficient are from the International Tables for X-ray Crystallography.5 All figures were generated using SHELXTL/PC.6 Tables of positional and thermal parameters, bond lengths and angles, figures and lists of observed and calculated structure factors are located in Crystallographic Information File (CIF format).

**References**

1. Z. Otwinowski and W. Minor, *Methods in Enzymology*, in Macromolecular Crystallography, part A, **276**, 307 – 326, C. W. Carter, Jr. and R. M. Sweets, Eds., Academic Press, San Diego, 1997.
2. A. Altomare, G. Cascarano, C. Giacovazzo and A. Guagliardi, *J. Appl. Cryst*., 1993, **26**, 343.
3. G. M. Sheldrick, *SHELXL97. Program for the Refinement of Crystal Structures*. University of Gottingen, Germany, 1994.
4. Rw(F2) = {w(|Fo|2 - |Fc|2)2/w(|Fo|)4}1/2 where w is the weight given each reflection. R(F) = (|Fo| - |Fc|)/|Fo|} for reflections with Fo > 4((Fo)). S = [w(|Fo|2 - |Fc|2)2/(n - p)]1/2, where n is the number of reflections and p is the number of refined parameters.
5. *International Tables for X-ray Crystallography*. Vol. C, Tables 4.2.6.8 and 6.1.1.4, A. J. C. Wilson, Ed., Kluwer Academic Press, Boston, 1992.
6. G. M. Sheldrick, G. M. *SHELXTL/PC (Version 5.03)*, Siemens Analytical X-ray Instruments, Inc., Madison, Wisconsin, USA, 1994.
